# Supplementary material for: Construction of dimetal-containing dithiolene and Schiff base conjugated polymer coating: exploiting metal coordination as a design strategy for improving infrared stealth properties
Source: Royal Society of Chemistry journal article supplement (doi:10.1039/c9py00880b), 2019-01-01
Supplement: c9py00880b1.pdf [file c9py00880b1.pdf]

Electronic Supplementary Information (ESI) for

# **Construction of Dimetal-Containing Dithiolene and Schiff Base Conjugated Polymer Coating: Exploiting Metal Coordination as a Design Strategy for Improving Infrared Stealth Properties**

Jingwen Cai,<sup>a,b,†</sup> Jianhua Han,<sup>a,c,†</sup> Guojia Ma,<sup>d</sup> Xing Liu,<sup>d</sup> Jinyan Wang <sup>\*a,b</sup> and Xigao Jian<sup>a,b</sup>

<sup>a</sup>*State Key Laboratory of Fine Chemicals, Dalian University of Technology, Dalian, 116024, China.*

<sup>b</sup>*Polymer Science & Materials, Chemical Engineering College, Dalian University of Technology, Dalian, 116024, China.*

<sup>c</sup>*CAS Key Laboratory of Bio-based Materials, Qingdao Institute of Bioenergy and Bioprocess Technology, Chinese Academy of Sciences, Qingdao, 266101, China.*

<sup>d</sup>*National Key Laboratory of Science and Technology on Power Beam Processes, Chinese Aeronautical Manufacturing Technology Research Institute, Beijing 100024, China.*

Correspondence to: Jinyan Wang (E-mail: wangjinyan@dlut.edu.cn)

<sup>†</sup> Jingwen Cai and Jianhua Han contributed equally to the manuscript.

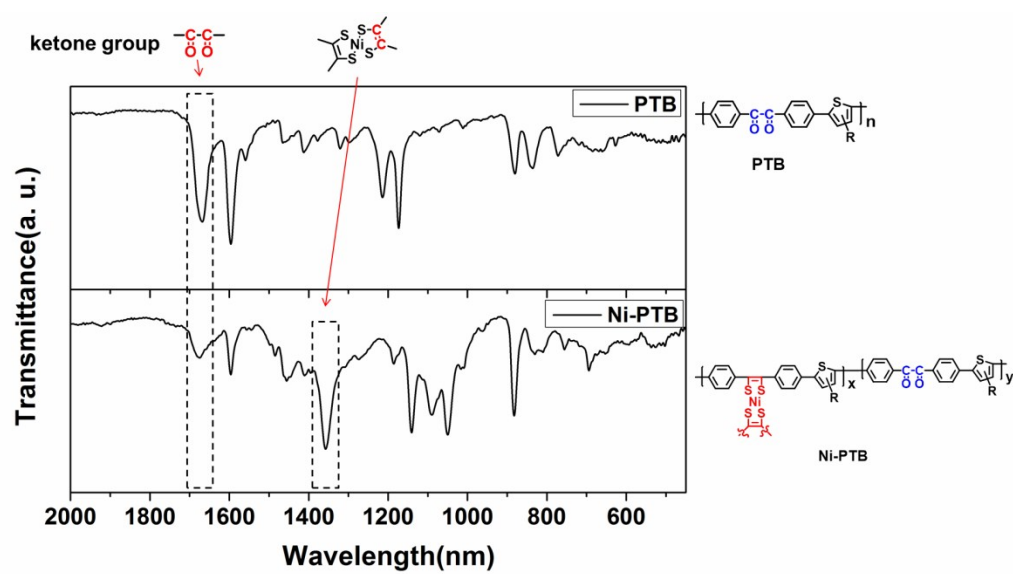

**Figure S1.** FT-IR spectra of PTB and Ni-PTB.

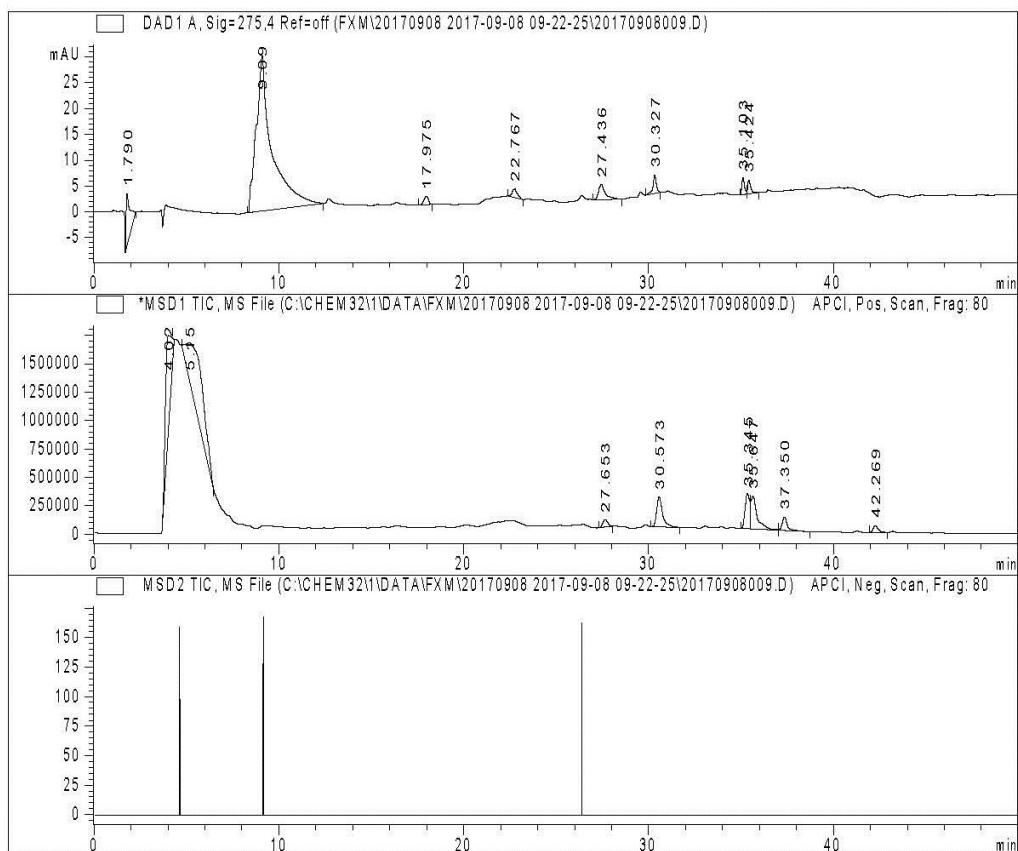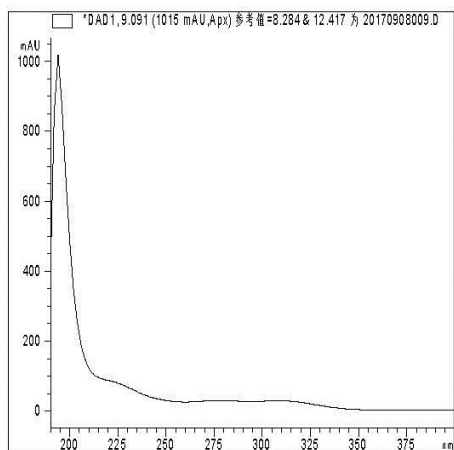

t=8.284

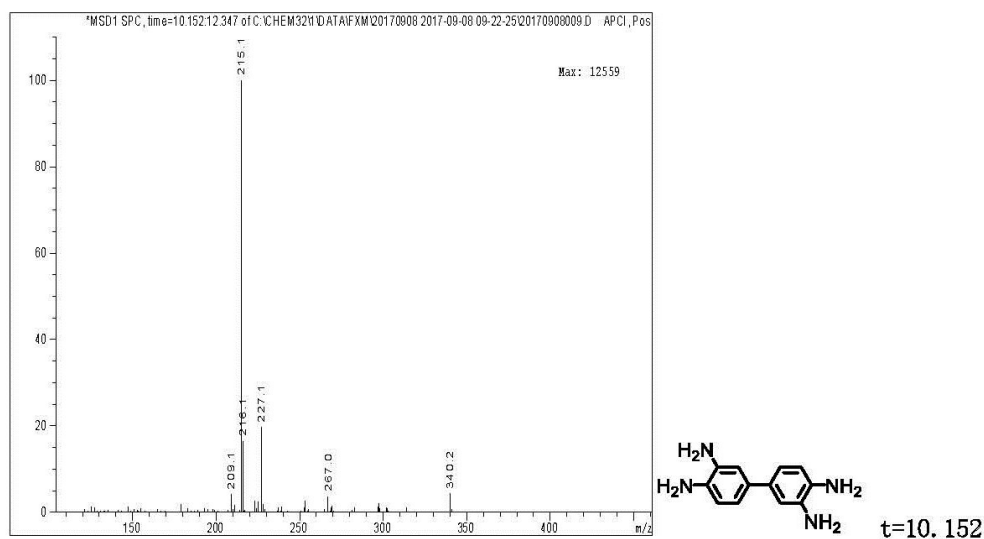

信号 1: DAD1 A, Sig=275, 4 Ref=off

| 峰<br># | 保留时间<br>[min] | 类型 | 峰宽<br>[min] | 峰面积<br>[mAU*s] | 峰高<br>[mAU] | 峰面积<br>% |
|--------|---------------|----|-------------|----------------|-------------|----------|
| 1      | 1.790         | BB | 0.2086      | 148.51447      | 10.03726    | 6.8290   |
| 2      | 9.090         | BB | 0.7226      | 1779.84033     | 30.33154    | 81.8411  |
| 3      | 17.975        | BB | 0.2619      | 28.16806       | 1.61207     | 1.2952   |
| 4      | 22.767        | BB | 0.2458      | 33.11319       | 1.72655     | 1.5226   |
| 5      | 27.436        | BB | 0.3761      | 76.23282       | 2.92471     | 3.5054   |
| 6      | 30.327        | BB | 0.1801      | 45.41558       | 3.62733     | 2.0883   |
| 7      | 35.103        | BV | 0.1457      | 32.81525       | 3.36614     | 1.5089   |
| 8      | 35.424        | VB | 0.1627      | 30.65146       | 2.69562     | 1.4094   |
| 总量 :   |               |    |             | 2174.75116     | 56.32122    |          |

**Figure S2.** HPLC-MS of polymers by Soxhlet extraction.

PS: products at other elution times are hard to confirm by their MS spectra, such as t=17.975 min, t=22.767 min and t=27.436 min.

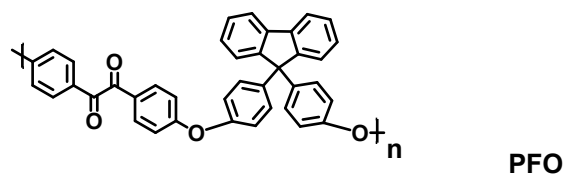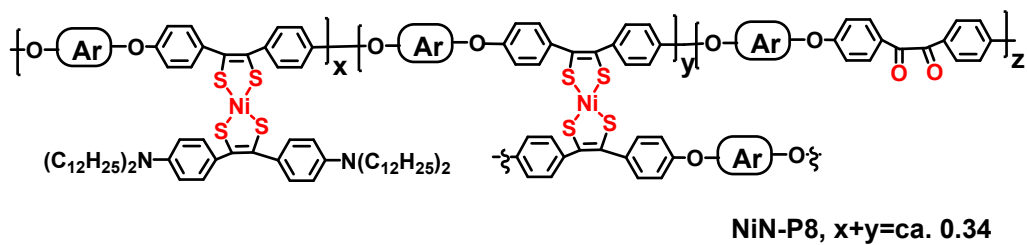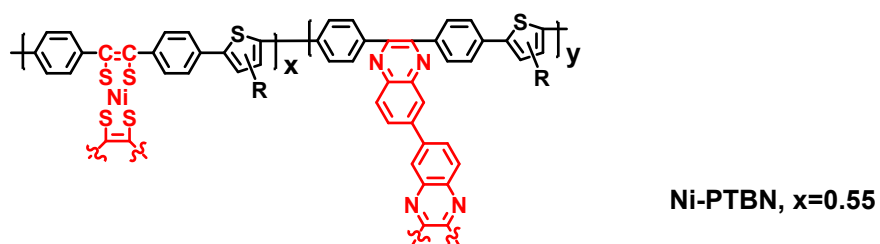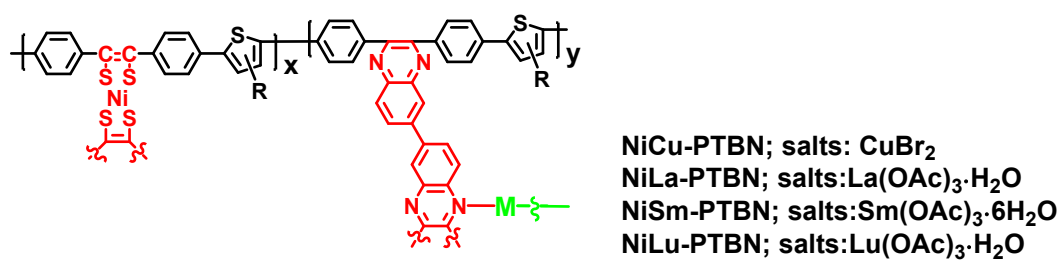

**Figure S3.** Structures of polymers in the comparison.

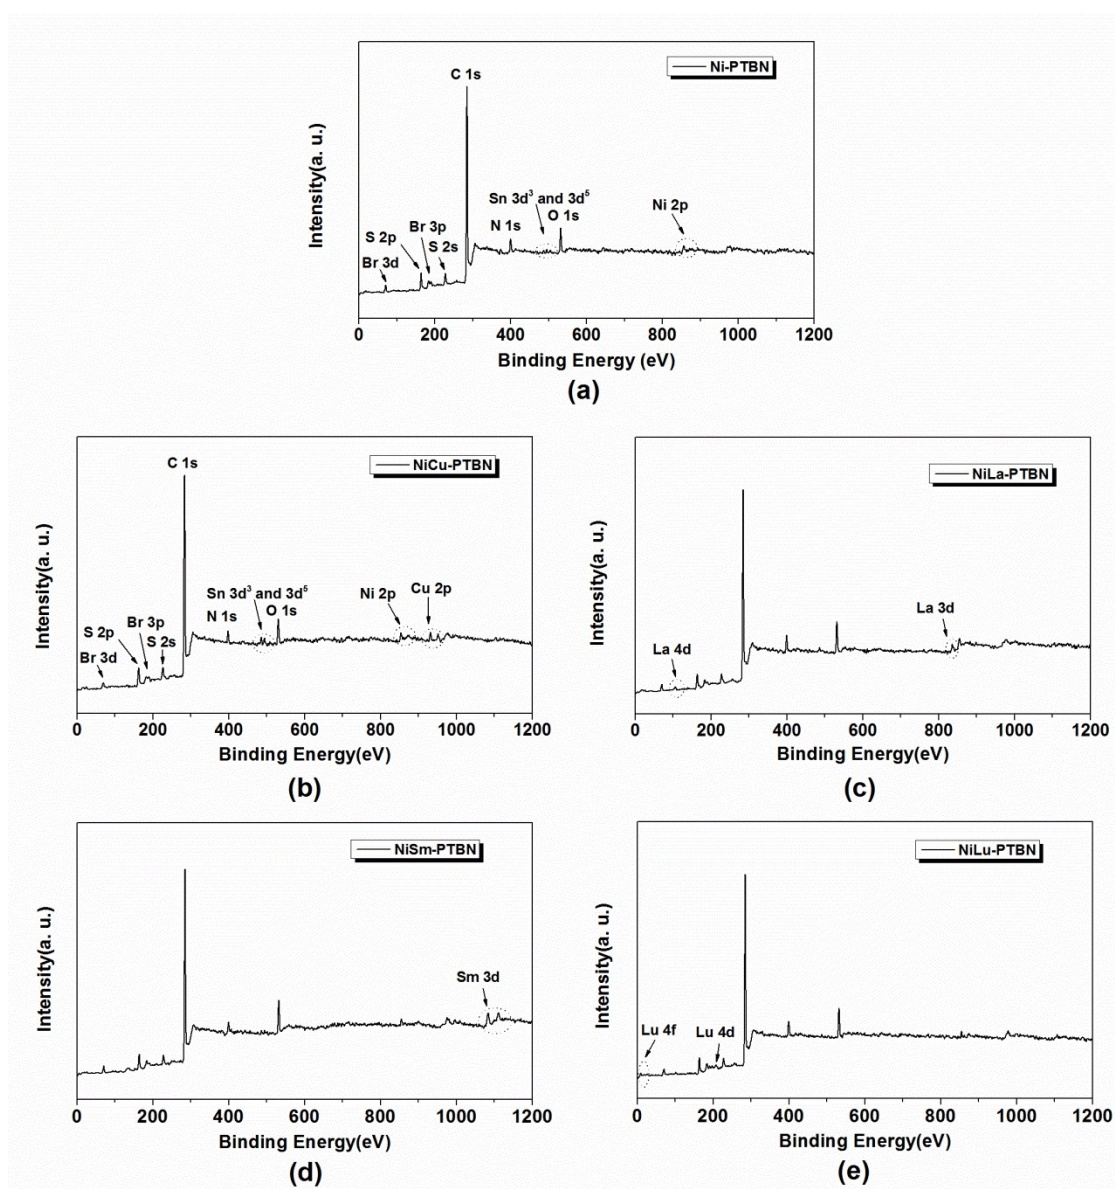

**Figure S4.** XPS spectra of polymers.

|           |                                                                                    | Adhesion force<br>(GB/T1720-1979) |
|-----------|------------------------------------------------------------------------------------|-----------------------------------|
| Ni-PTBN   |   | First grade                       |
| NiCu-PTBN |   | First grade                       |
| NiLa-PTBN |   | First grade                       |
| NiSm-PTBN |   | First grade                       |
| NiLu-PTBN |  | First grade                       |

**Figure S5.** Adhesion force of polymer coatings.

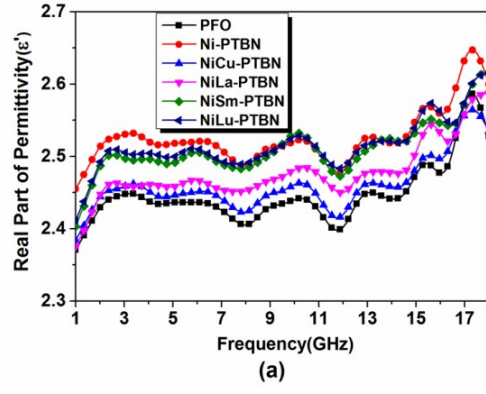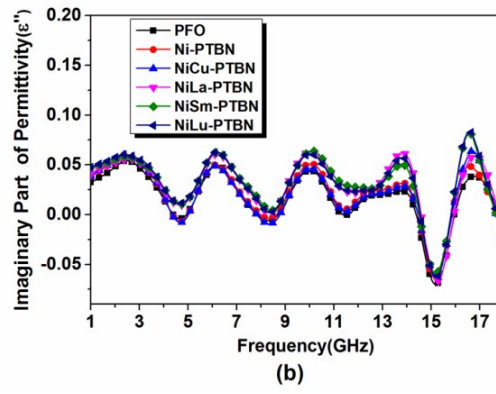

**Figure S6.** Real part  $\epsilon'$ (a) and imaginary part  $\epsilon''$ (b) of complex permittivity for coating.



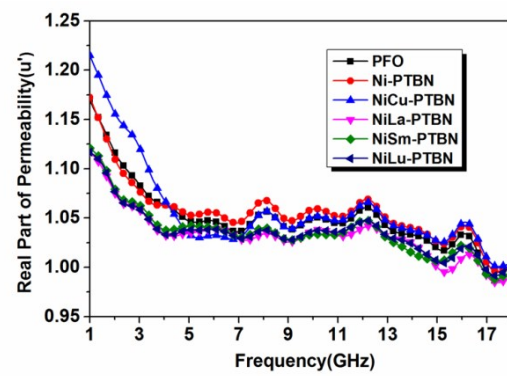

(a)

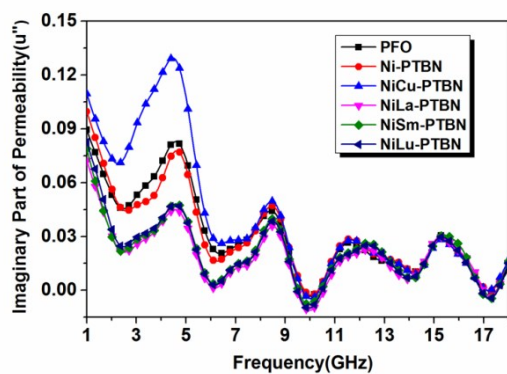

(b)

**Figure S7.** Real part  $\mu'$ (a) and the imaginary part  $\mu''$ (b) of complex permeability for coating.
